# Supplementary material
Source: ML conference proceedings conference paper supplement (https://proceedings.neurips.cc/paper_files/paper/2018/hash/8051a3c40561002834e59d566b7430cf-Abstract.html)
Supplement: Supplementary file [file 8051a3c40561002834e59d566b7430cf-Supplemental.zip]

---

# Supplementary Materials for the Paper “Learning to Teach with Dynamic Loss Functions”

---

<sup>1</sup>Lijun Wu<sup>†,\*</sup>, <sup>2</sup>Fei Tian<sup>†</sup>, <sup>2</sup>Yingce Xia, <sup>3</sup>Yang Fan<sup>\*</sup>,

<sup>2</sup>Tao Qin, <sup>1</sup>Jianhuang Lai, <sup>2</sup>Tie-Yan Liu

<sup>1</sup>Sun Yat-sen University, Guangzhou, China    <sup>2</sup>Microsoft Research, Beijing, China

<sup>3</sup>University of Science and Technology of China, Hefei, China

<sup>1</sup>wulijun3@mail2.sysu.edu.cn, stsljh@mail.sysu.edu.cn

<sup>2</sup>{fetia, yingce.xia, taoqin, tie-yan.liu}@microsoft.com, <sup>3</sup>fyabc@mail.ustc.edu.cn

## 1 Derivations For the Updating Rules of Teacher Model Parameters

We provide derivations of Eqn. (4) and (5) in the original paper. The starting point is Eqn.(1):

$$\omega_{t+1} = \omega_t - \eta_t \frac{\partial L_{\Phi_t}(f_{\omega_t}, D_{train}^t)}{\partial \omega_t} = \omega_t - \eta_t \frac{\partial L_{\mu_\theta(s_t)}(f_{\omega_t}, D_{train}^t)}{\partial \omega_t}. \quad (1)$$

Then we have:

$$\begin{aligned} d\omega_t &= \frac{\partial \tilde{\mathcal{M}}(f_{\omega_T}, D_{dev})}{\partial \omega_t} = \left( \frac{\partial \omega_{t+1}}{\partial \omega_t} \right)' \frac{\partial \tilde{\mathcal{M}}(f_{\omega_T}, D_{dev})}{\partial \omega_{t+1}} \\ &= \left( I - \eta_t \frac{\partial^2 L_{\mu_\theta(s_t)}(f_{\omega_t}, D_{train}^t)}{\partial \omega_t^2} \right)' d\omega_{t+1} \\ &= d\omega_{t+1} - \eta_t \frac{\partial^2 L_{\mu_\theta(s_t)}(f_{\omega_t}, D_{train}^t)}{\partial \omega_t^2} d\omega_{t+1}. \end{aligned} \quad (2)$$

The last equation in Eqn. (2) leverages the symmetry of Hessian matrix: for a function  $g(x, y)$ ,  $\frac{\partial^2 g}{\partial x \partial y} = \frac{\partial^2 g}{\partial y \partial x}$ .

We further have the gradient of  $\theta$  only incurred at timestep  $t$  (i.e., via Eqn.(1)), denoted as  $d\theta|_t$ , is:

$$\begin{aligned} d\theta|_t &= \frac{\partial \tilde{\mathcal{M}}(f_{\omega_T}, D_{dev})}{\partial \theta} \Big|_t = \left( \frac{\partial \omega_{t+1}}{\partial \theta} \Big|_t \right)' \frac{\partial \tilde{\mathcal{M}}(f_{\omega_T}, D_{dev})}{\partial \omega_{t+1}} \\ &= -\eta_t \left( \frac{\partial^2 L_{\mu_\theta(s_t)}(f_{\omega_t}, D_{train}^t)}{\partial \omega_t \partial \theta} \right)' d\omega_{t+1} \\ &= -\eta_t \frac{\partial^2 L_{\mu_\theta(s_t)}(f_{\omega_t}, D_{train}^t)}{\partial \theta \partial \omega_t} d\omega_{t+1}, \end{aligned} \quad (3)$$

where  $\frac{\partial \omega_{t+1}}{\partial \theta} \Big|_t$  represents the effect of  $\theta$  to the value of  $\omega_{t+1}$  happened only at timestep  $t$ , but not related with the effect to the value of  $\omega_t$ . Therefore we equivalently have  $\frac{\partial \omega_t}{\partial \theta} = 0$  in calculating  $\frac{\partial \omega_{t+1}}{\partial \theta} \Big|_t$ . The last equation in Eqn. (3) again leverages the symmetry of Hessian matrix.

---

\*The work was done when the first and fourth authors were interns at Microsoft Research Asia.

<sup>†</sup>The first two authors contribute equally to this work.

By observing  $d\theta = \sum_{t=0}^{T-1} d\theta|_t$ , we obtain the recursive way to update  $d\theta$  at timestep  $t$  as in Eqn.(5) of the main paper:

$$d\theta = d\theta + d\theta|_t = d\theta - \eta_t \frac{\partial^2 L_{\mu_\theta(s_t)}(f_{\omega_t}, D_{train}^t)}{\partial \theta \partial \omega_t} d\omega_{t+1}. \quad (4)$$

## 2 Experiment Details

The details of network structures for the student models, the dataset used for neural machine translation, the training procedure for student and teacher models are provided here.

### 2.1 MNIST

For MNIST dataset, we choose the simple multi-layer perceptron (MLP) and vanilla convolutional neural network (CNN) based LeNet architecture as our student models.

The MLP contains only one single hidden layer with hidden size 500, and the logistic regression output layer with size 10. The input MNIST training sample is a flattened vector with size  $28 \times 28$ . The model is trained with mini-batch size 20, momentum SGD [9] is adopted with learning rate 0.01 and momentum 0.9 in straining the student model.

The LeNet [8] model contains two (convolution + max-pooling) layers with kernel size  $5 \times 5$  and filter number 20, 50 respectively, followed by one MLP with hidden size 500. The model is trained with mini-batch size 500 and the learning rate for momentum SGD update is 0.01, the momentum is 0.9.

### 2.2 CIFAR-10/CIFAR-100

For CIFAR-10 and CIFAR-100, we use the advanced CNN architecture ResNet [4] with different number of layers, and also the Wide-ResNet [13], DenseNet [6] which has superior performance.

We use the original and typical setting for the ResNet architecture. The inputs for the network are  $32 \times 32$  images, with the per-pixel mean subtracted. The first layer is  $3 \times 3$  convolutions, and then stack of  $6n$  layers with  $3 \times 3$  convolutions on the feature maps of sizes  $\{32, 16, 8\}$ . The numbers of filters are  $\{16, 32, 64\}$  respectively. The subsampling is performed after convolutions with a stride of 2. The network ends with a global average pooling layer, a 10-way (for CIFAR-10) or 100-way (for CIFAR-100) fully-connected layer and softmax layer. There are totally  $6n + 2$  stacked weighted layers. Identity shortcuts are connected to the pairs of  $3 \times 3$  layers. We vary the  $n = \{1, 3, 5\}$ , leading to  $\{8, 20, 32\}$ -layer networks to evaluate our algorithm. The momentum optimizer with learning rate 0.1 and momentum 0.9 is conducted to update the student model, the learning rate is divided by 10 after 40 and 60 epochs. The mini-batch size is 128 in training. For data augmentation we do horizontal flips and take random crops from image padded by 4 pixels on each side, filling missing pixels with reflections of original image.

For CIFAR-10 dataset, we further adopt Wide-ResNet (WRN) and DenseNet as our student model. The WRN decreases the depth and increases width of ResNet. The specific configuration is WRN-40-10 setting, a ResNet with 40 convolutional layers and a widening factor 10 (the number of filters are 10 times wider than the original ResNet, which is  $\{160, 320, 640\}$ ). Other details are same as ResNet setting. For the DenseNet, the configuration is same as in [6], with bottleneck layers and compression module, named as DenseNet-BC. Specifically, the layer number  $L$  is 190 and the growth rate  $k$  is 40.

### 2.3 IWSLT-14 German-English NMT

For neural machine translation (NMT) experiment, the IWSLT-14 German-English [3] dataset we choose is a well-acknowledged benchmark in NMT literature. The training/dev/test dataset respectively contains roughly  $153k/7k/7k$  sentence pairs. We process the German and English sentences to be  $25k$  sub-word units by byte-pair-encoding (BPE) [10] approach. The student model we used is based on LSTM [5] with attention mechanism [2] and the Transformer [12] network based on self-attention. The embedding size and hidden state size are both set as 256. *LSTM-1* contains only

one LSTM layer while *LSTM-2* has two LSTM hidden layers. Both student models are trained with simple SGD with learning rate 0.1, the mini-batch size is 32. The configuration for *Transformer* is the *transformer\_small* setting with 6 layers of the encoder and decoder. To speed up the training process, as commonly done in previous works [1, 11], we pretrain our student models for several epochs as warm-start models, and the training/dev set BLEU scores are computed based on the greedy searched translation results.

## 2.4 Teacher Optimization

For all experiments, the teacher models are optimized by Adam [7] with  $\alpha = 0.0001$ ,  $\beta_1 = 0.9$ ,  $\beta_2 = 0.999$  and  $\epsilon = 10^{-8}$ . The teacher models are optimized with 60, 100 and 50 steps (i.e., the number of teacher optimization steps in Algorithm 1 of the paper) for MNIST, CIFAR-10/CIFAR-100 and German-English translation tasks respectively.

## References

- [1] Dzmitry Bahdanau, Philemon Brakel, Kelvin Xu, Anirudh Goyal, Ryan Lowe, Joelle Pineau, Aaron Courville, and Yoshua Bengio. An actor-critic algorithm for sequence prediction. *arXiv preprint arXiv:1607.07086*, 2016.
- [2] Dzmitry Bahdanau, Kyunghyun Cho, and Yoshua Bengio. Neural machine translation by jointly learning to align and translate. *arXiv preprint arXiv:1409.0473*, 2014.
- [3] M Cettolo, J Niehues, S Stüker, L Bentivogli, and M Federico. Report on the 11th iwslt evaluation campaign, iwslt 2014. In *IWSLT-International Workshop on Spoken Language Processing*, pages 2–17. Marcello Federico, Sebastian Stüker, François Yvon, 2014.
- [4] Kaiming He, Xiangyu Zhang, Shaoqing Ren, and Jian Sun. Deep residual learning for image recognition. In *Proceedings of the IEEE conference on computer vision and pattern recognition*, pages 770–778, 2016.
- [5] Sepp Hochreiter and Jürgen Schmidhuber. Long short-term memory. *Neural computation*, 9(8):1735–1780, 1997.
- [6] Gao Huang, Zhuang Liu, Laurens Van Der Maaten, and Kilian Q Weinberger. Densely connected convolutional networks. In *CVPR*, 2017.
- [7] Diederik P Kingma and Jimmy Ba. Adam: A method for stochastic optimization. *arXiv preprint arXiv:1412.6980*, 2014.
- [8] Yann LeCun, Léon Bottou, Yoshua Bengio, and Patrick Haffner. Gradient-based learning applied to document recognition. *Proceedings of the IEEE*, 86(11):2278–2324, 1998.
- [9] Ning Qian. On the momentum term in gradient descent learning algorithms. *Neural networks*, 12(1):145–151, 1999.
- [10] Rico Sennrich, Barry Haddow, and Alexandra Birch. Neural machine translation of rare words with subword units. In *Proceedings of the 54th Annual Meeting of the Association for Computational Linguistics (Volume 1: Long Papers)*, volume 1, pages 1715–1725, 2016.
- [11] Shiqi Shen, Yong Cheng, Zhongjun He, Wei He, Hua Wu, Maosong Sun, and Yang Liu. Minimum risk training for neural machine translation. In *Proceedings of the 54th Annual Meeting of the Association for Computational Linguistics (Volume 1: Long Papers)*, pages 1683–1692. Association for Computational Linguistics, 2016.
- [12] Ashish Vaswani, Noam Shazeer, Niki Parmar, Jakob Uszkoreit, Llion Jones, Aidan N Gomez, Łukasz Kaiser, and Illia Polosukhin. Attention is all you need. In *Advances in Neural Information Processing Systems*, pages 6000–6010, 2017.
- [13] Sergey Zagoruyko and Nikos Komodakis. Wide residual networks. *arXiv preprint arXiv:1605.07146*, 2016.
